# Supplementary material for: Identification and Functional Characterization of Novel MYC-Regulated Long Noncoding RNAs in Group 3 Medulloblastoma
Source: MDPI journal article supplement (doi:10.3390/cancers13153853), 2021-07-30
Supplement: s1 [file s1]

# Supplementary Material: Identification and Functional Characterization of Novel MYC-Regulated Long Noncoding RNAs in Group 3 Medulloblastoma

Jessica Rea, Annamaria Carissimo, Daniela Trisciuglio, Barbara Illi, Daniel Picard, Marc Remke, Pietro Laneve and Elisa Caffarelli

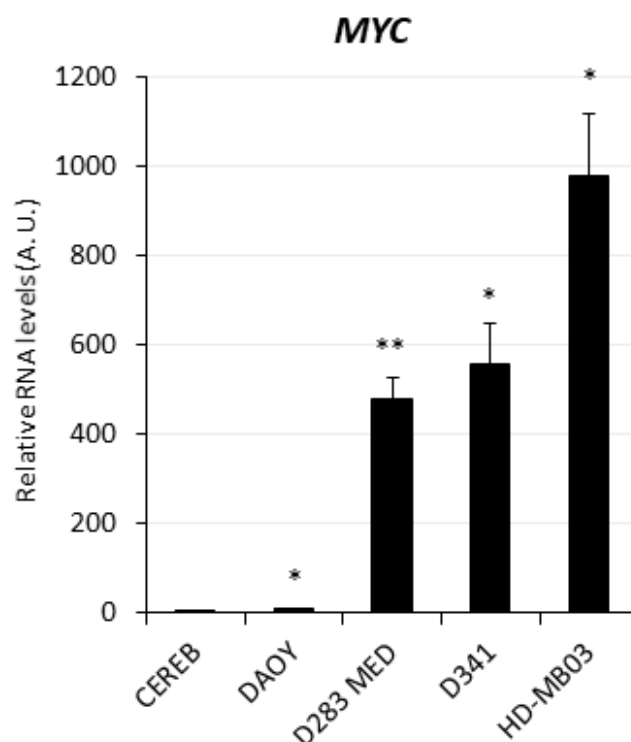

**Figure S1.** MYC expression in G3- and SHH-derived cell lines compared to cerebellum. qRT-PCR analysis of *MYC* in DAOY, D283 MED, D341, HD-MB03 compared to healthy cerebellum RNA samples (CERE, set as 1). Data (means  $\pm$  SEM) are expressed in arbitrary units (A.U.) and are relative to *ATP5O* mRNA levels.  $N = 3$ , \* $p \leq 0.05$ , \*\* $p \leq 0.01$  (two-tailed Student's *t*-test).

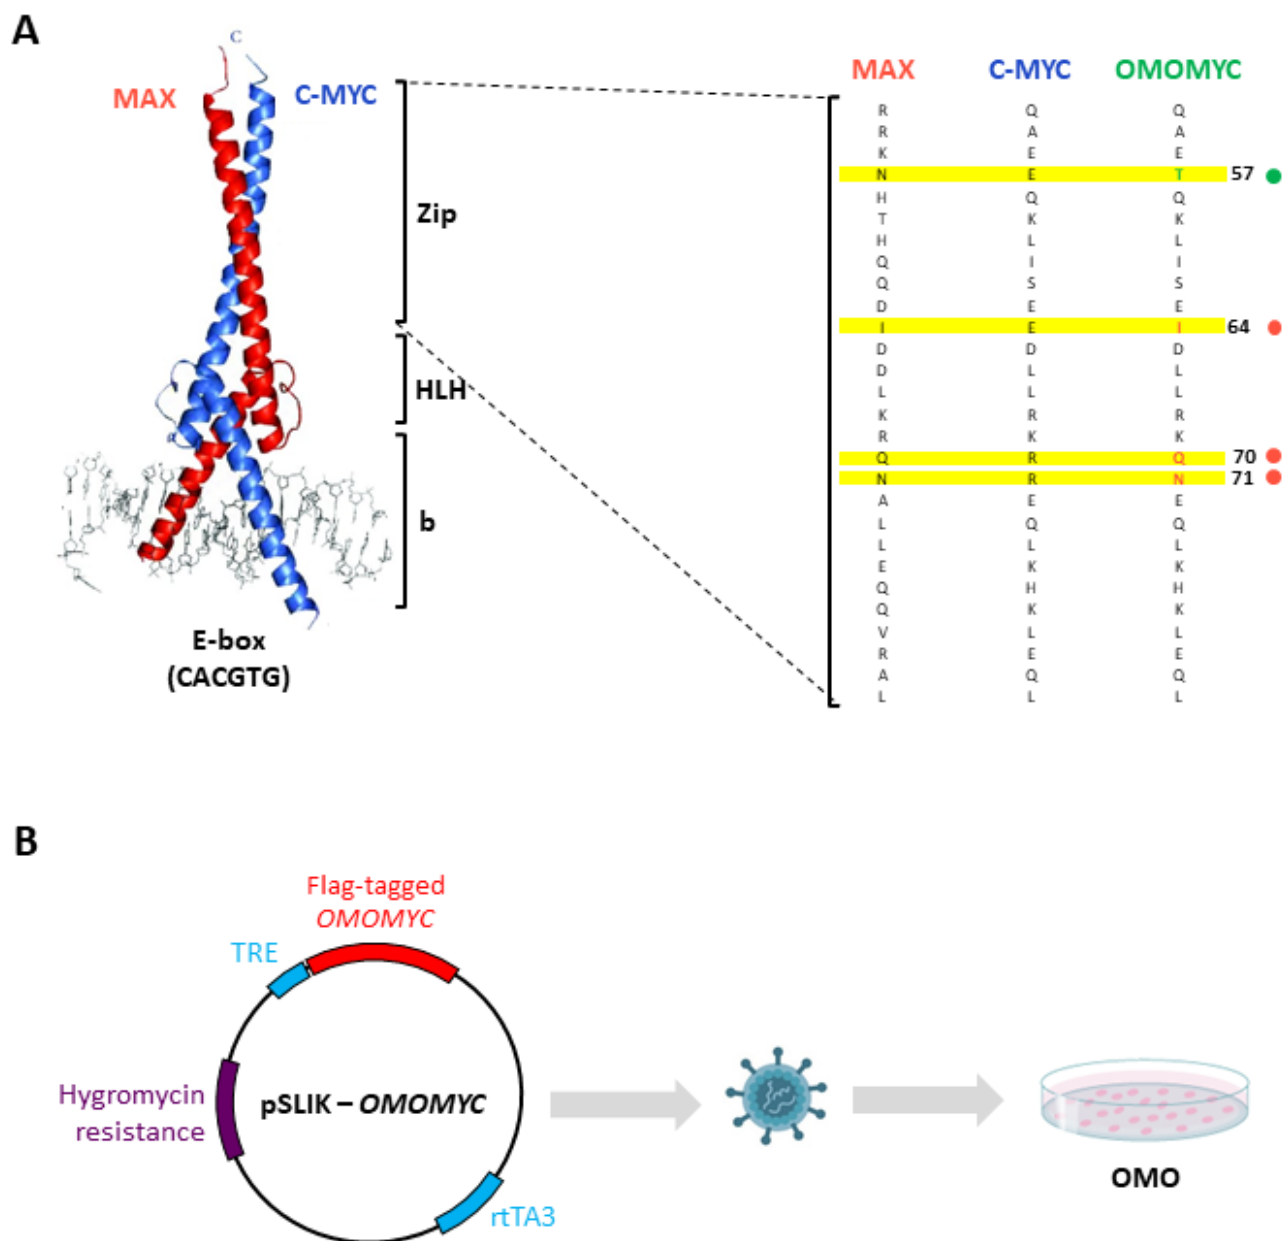

**Figure S2.** Schematic representation of OMOMYC and pSLIK-OMOMYC construct. (A) OMOMYC Structure. (B) FLAG tagged OMOMYC cassette is highlighted in red. Hygromycin resistance for transduced cell selection is indicated in blue.

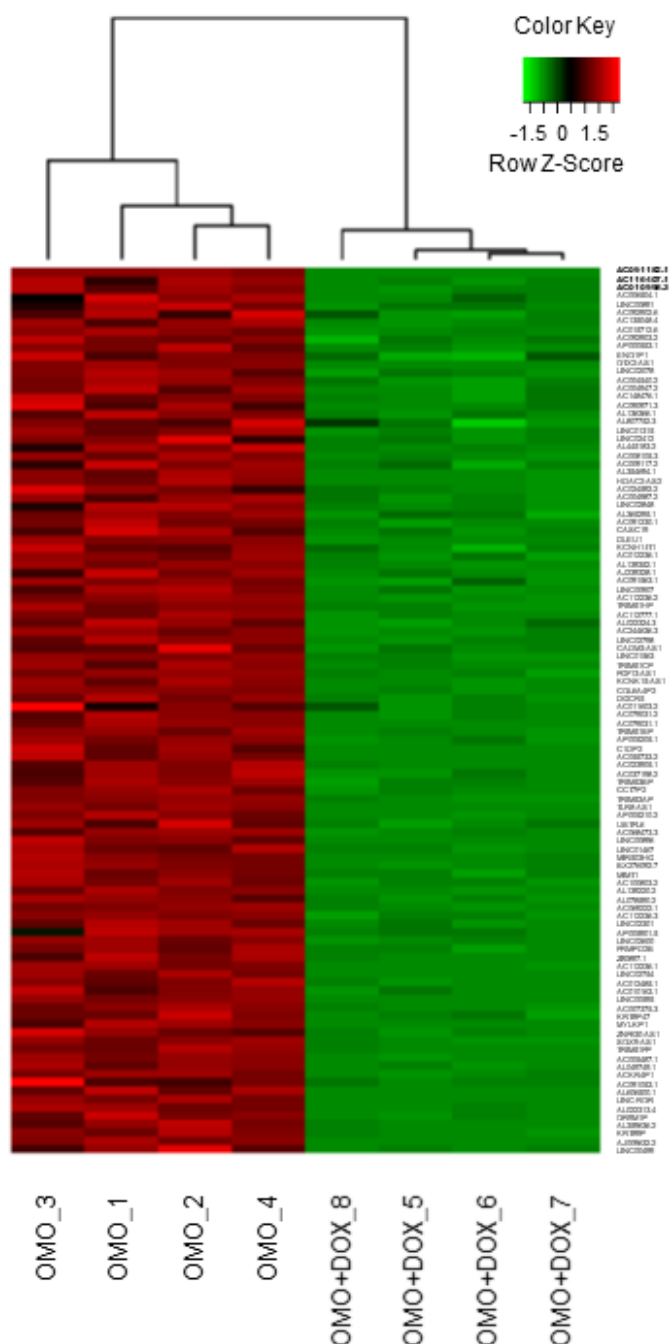

**Figure S3.** lncRNAs downregulated upon MYC inhibition. Heatmap showing the levels of the 106 lncRNAs downregulated in DOX-treated (72h) D283-OMO cells (OMO + DOX) compared to untreated cells (OMO), along with sample hierarchical clustering. Details as in Figure 2A.

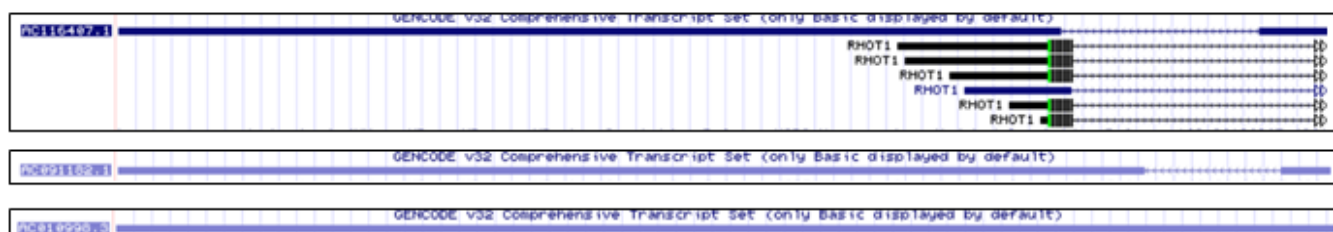

**Figure S4.** *lncMB1*, *lncMB2* and *lncMB3* genes from UCSC database. UCSC screen shots showing *lncMB1*, *lncMB2* and *lncMB3* gene structure.

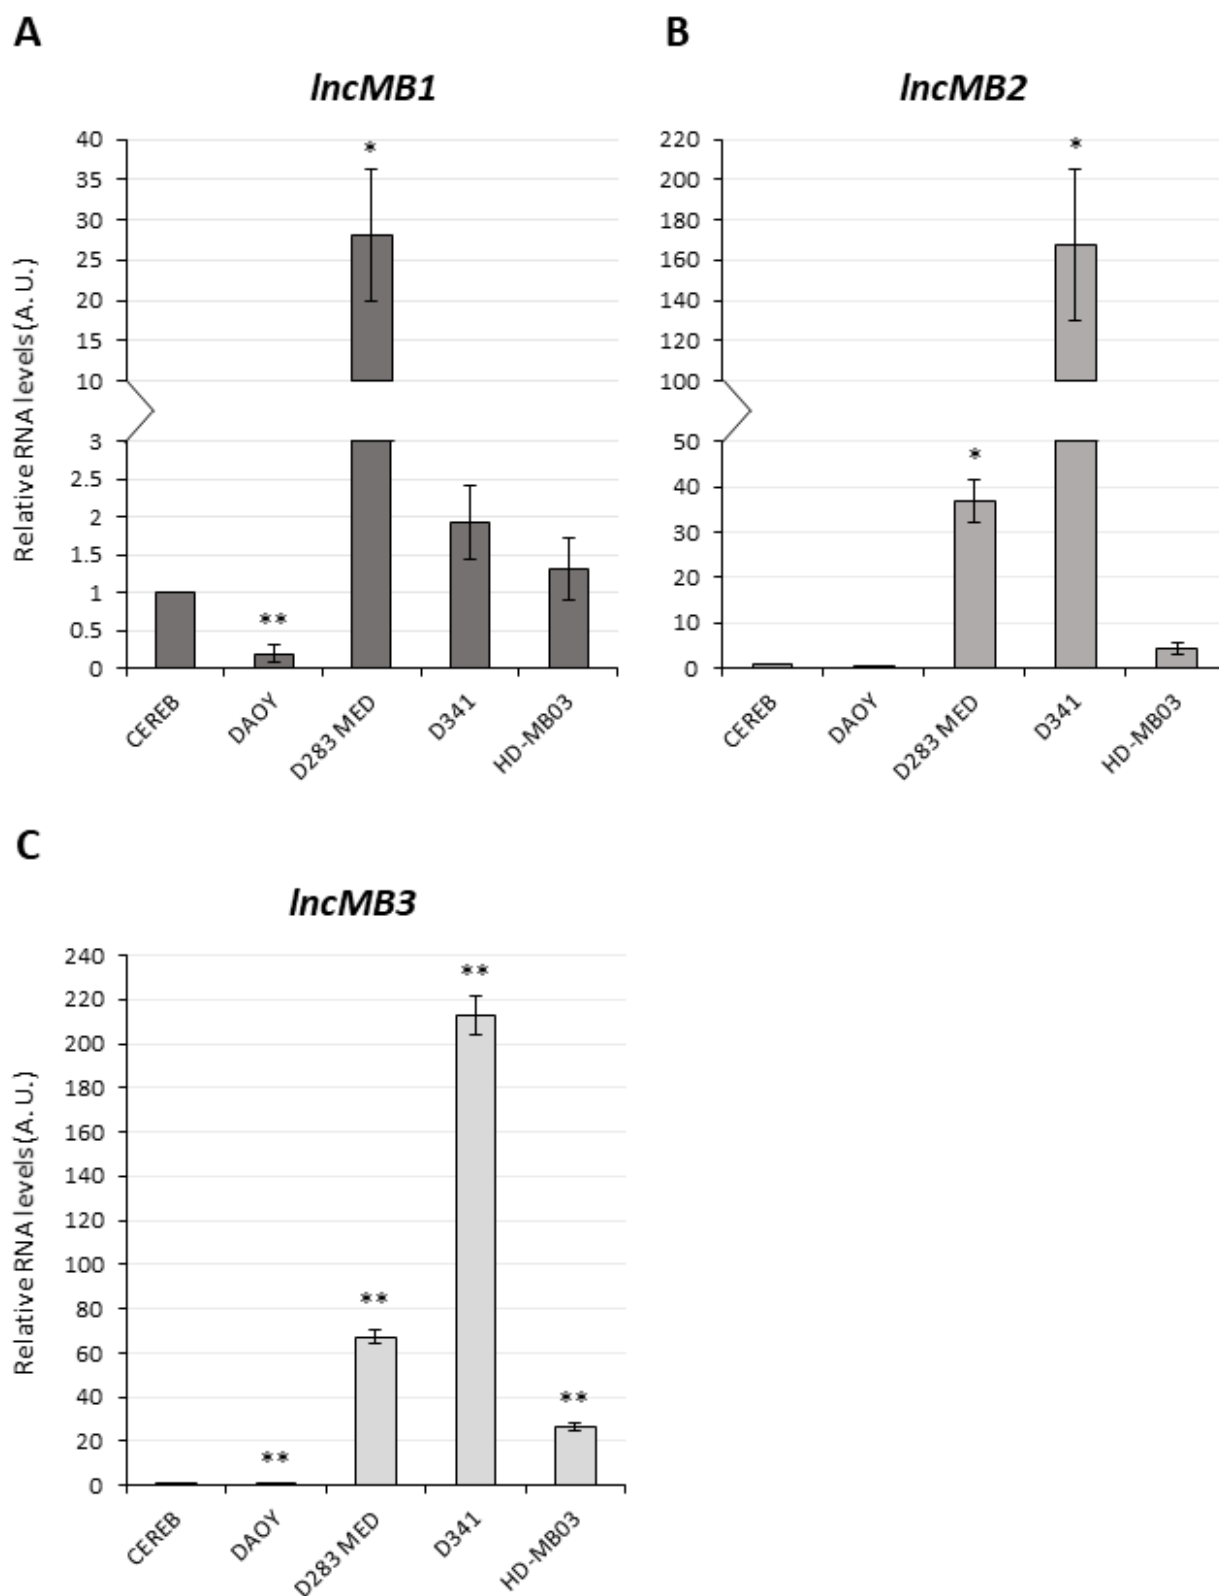

**Figure S5.** Expression profiles of *lncMB1*, *lncMB2* and *lncMB3* in G3- and SHH-derived cell lines compared to cerebellum. (A) qRT-PCR analysis in DAOY, D283 MED, D341, HD-MB03 compared to healthy cerebellum RNA samples (CEREB, set as 1) of *lncMB1*. Data (means  $\pm$  SEM) are expressed in arbitrary units (A.U.) and are relative to *ATP5O* mRNA levels.  $N = 3$ ,  $*p \leq 0.05$ ,  $**p \leq 0.01$  (two-tailed Student's *t*-test). (B) qRT-PCR analysis in DAOY, D283 MED, D341, HD-MB03 compared to healthy cerebellum RNA samples (CEREB, set as 1) of *lncMB2*.  $N = 3$ ,  $*p \leq 0.05$  (two-tailed Student's *t*-test). (C) qRT-PCR analysis in DAOY, D283 MED, D341, HD-MB03 compared to healthy cerebellum RNA samples (CEREB, set as 1) of *lncMB3*.  $N = 3$ ,  $**p \leq 0.01$ .

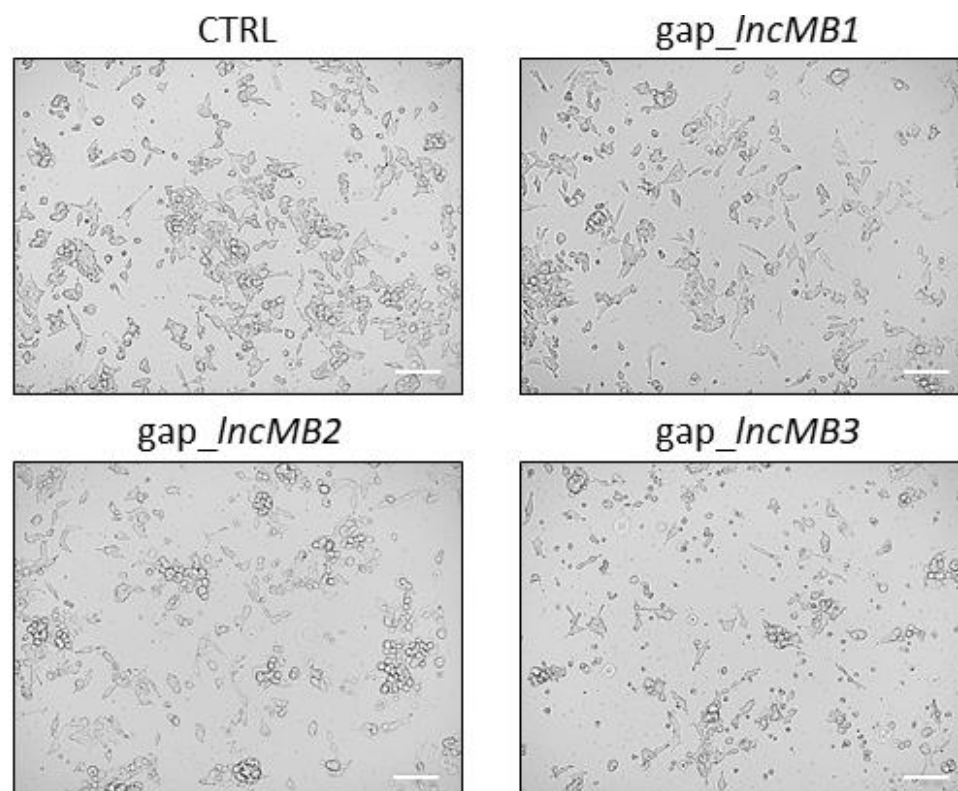

**Figure S6.** *lncMB1*, *lncMB2* and *lncMB3* knock-down affects DOX-untreated D283-OMO cell morphology. Scale bar: 100  $\mu$ m. Pictures were taken the day after the last LNA-GapmeR transfection pulse (i.e., day4 after cell seeding).

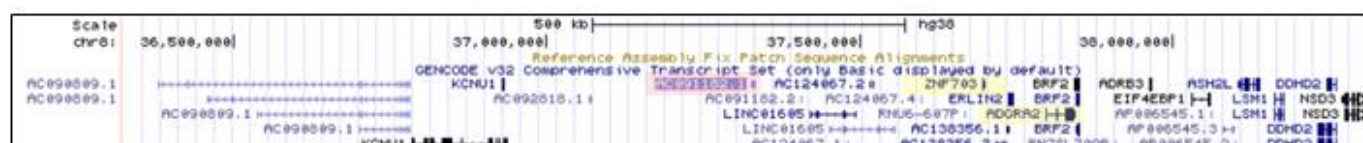

**Figure S7.** Genomic position of *lncMB2* and its flanking genes from UCSC genome browser. UCSC screenshot showing the chromosomal position and the genomic coordinates of *lncMB2* locus in the human genome. *lncMB2* flanking genes mapping 360 Kb and 460 Kb apart are indicated.

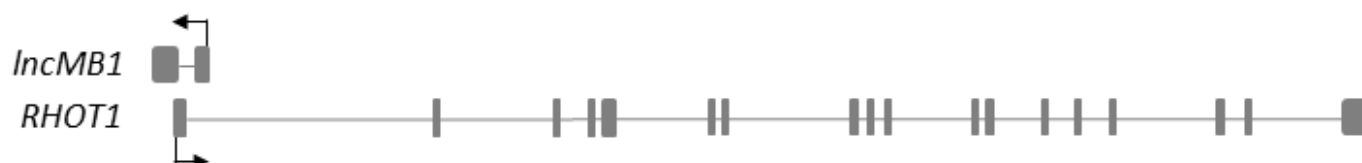

**Figure S8.** *lncMB1* partially overlaps to *RHOT1* mRNA. Schematic representation of *lncMB1* and *RHOT1* mRNA complementarity. About 36% of *lncMB1* sequence overlaps to *RHOT1* gene.

**Table S1 (available in the separate pdf file).** List of LNA GapmeRs used in this study.

**Table S2(available in the separate pdf file).** RNA-Seq read mapping statistics.

**Table S3 (available in the separate pdf file).** List of oligonucleotides used in this study.

**Dataset S1 (available in the separate excel file).** Unique gene loci expressed in untreated or DOX-treated D283-OMO cells.

**Dataset S2 (available in the separate excel file).** Differentially expressed genes FDR < 0.01 log<sub>2</sub>FC > |2|.

**Dataset S3 (available in the separate excel file).** Crossed\_CPM + FC\_down.

**Dataset S4 (available in the separate excel file).** Crossed\_CPM + FC\_up.

**Uncropped Western Blot images (available in the separate PDF file).** Complete blots from the cropped blots reported throughout the manuscript.

**Publisher's Note:** MDPI stays neutral with regard to jurisdictional claims in published maps and institutional affiliations.

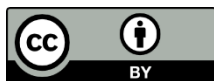

© 2021 by the authors. Licensee MDPI, Basel, Switzerland. This article is an open access article distributed under the terms and conditions of the Creative Commons Attribution (CC BY) license (<http://creativecommons.org/licenses/by/4.0/>).
