# Supplementary material for: Identification and Functional Characterization of Novel MYC-Regulated Long Noncoding RNAs in Group 3 Medulloblastoma
Source: MDPI journal article supplement (doi:10.3390/cancers13153853), 2021-07-30
Supplement: s1 [file s1]

Table S2

|           | INPUT READS<br>N° | UNIQUELY MAPPED<br>READS % | MULTI-MAPPING<br>READS % | UNMAPPED<br>READS % |
|-----------|-------------------|----------------------------|--------------------------|---------------------|
| OMO_1     | 60552518          | 95.12%                     | 4.28%                    | 0.60%               |
| OMO_2     | 64214678          | 95.06%                     | 4.34%                    | 0.60%               |
| OMO_3     | 60835503          | 94.81%                     | 4.66%                    | 0.53%               |
| OMO_4     | 55273934          | 95.24%                     | 4.18%                    | 0.58%               |
| OMO+Dox_1 | 60833164          | 93.80%                     | 4.03%                    | 2.17%               |
| OMO+Dox_2 | 48271343          | 93.98%                     | 4.00%                    | 2.02%               |
| OMO+Dox_3 | 61011572          | 93.62%                     | 4.20%                    | 2.18%               |
| OMO+Dox_4 | 53736082          | 93.71%                     | 4.17%                    | 2.12%               |
