# Supplementary material for: Identification and Functional Characterization of Novel MYC-Regulated Long Noncoding RNAs in Group 3 Medulloblastoma
Source: MDPI journal article supplement (doi:10.3390/cancers13153853), 2021-07-30
Supplement: s1 [file s1]

**Table S1**

| LNA GapmeR name | LNA GapmeR sequence (5'-3') |
|-----------------|-----------------------------|
| CTRL            | AACACGTGTATACGC             |
| gap_AC116407.1  | TAAAAGCACTTAGTCG            |
| gap_AC091182.1  | ACGGAGGATTTAATTC            |
| gap_AC010998.3  | ACGGTGAGGAGTTAAC            |
