# Supplementary material for: Identification and Functional Characterization of Novel MYC-Regulated Long Noncoding RNAs in Group 3 Medulloblastoma
Source: MDPI journal article supplement (doi:10.3390/cancers13153853), 2021-07-30
Supplement: s1 [file s1]

Table S3

| Gene name  | Forward oligo sequence (5'-3') | Reverse oligo sequence (5'-3') |
|------------|--------------------------------|--------------------------------|
| ATP5O      | ACTCGGGTTTGACCTACAGC           | GGTACTGAAGCATCGCACCT           |
| pre-ATP5O  | CTTGGCCTTGACTTAGGAAGC          | CAAAGGGAGGAGCTCACAAG           |
| LINC00499  | AGCAGTTCATCTCATCTCTCCA         | TGTTCTCCGGAAGCTTAGAGTC         |
| AL022313.4 | TTTTGGGGTTGGTCTTACA            | GTCTTTGGGGGTCTGTGAAA           |
| AL606500.1 | GCCAATTCCAGACACGTTTT           | TCATTTGGGGTTCATTTGT            |
| AC091053.1 | AGCGAACTTCATCCATGCT            | GCCGCTTCTTGAGGTTTTT            |
| AC116407.1 | CCGACATGAAGAAAGACGTG           | GGGTTCGAAGAGGAAAAGGA           |
| AC091182.1 | AGGATTCTGCCGTGAGTGAC           | GAGAACTCCCTGGTGAA              |
| ACKR4P1    | CCCGCTACCTAGGAACATCA           | TCTATGGCTCGGCAGAACTT           |
| TRIM51FP   | GGACTTCTGGACAGGCTCAG           | CAAAAGCCCAATTCCAAGAA           |
| MYLKP1     | ATGCAGTTGCCAGATGTCAC           | ACCATCAGCACCAACTCCTC           |
| AC007375.3 | GAAGCCACCGAGAAATAGGA           | GATTCCAAGGTGACCAGTCG           |
| LINC00595  | GGTCTCAAACCTCCCGTGTC           | CAGTGCTGATGACTCCCTCA           |
| LINC02754  | GTCATGATTGAGAGGCAACG           | TGACTGATCCCATCACAGGA           |
| Z80897.1   | TGGCAGAACAGAATGCTAAACA         | TGGGGCTCTTGAAAGTGAAT           |
| LINC02600  | TGTCATGTGACCAGGAGGAG           | TTCAGCCGCAAGTTACAGAA           |
| AP005901.5 | TTTGTAACCTTCGCATTCCA           | GATTACAGGCGTGAGCCACT           |
| AC010998.3 | GGGCAAAATGTCCAGCTCTA           | AGCATGGCTTTGAGAAGAGG           |
| AC112236.3 | GGAGAGCTCCAGCAAGGAT            | AAATATCAGGCCCTTTGCAG           |
| AC069222.1 | CTGGTAGGGGTTCTCCATGA           | GAACCTCCACCTGGATTTC            |
| MIR503HG   | TGCTAACTGGAGATGCTGGA           | CAGCCTTCCTGAAAGACCAA           |
| AP001626.1 | TCACAGACTCCCCAGAAAC            | CAAGGCTGTTCAAGACCAA            |
| FAM238B    | GCAACAGAACAAGGGCTCAT           | CGAGGGCTGGCTTCTTATC            |
| AC084212.1 | GGCACTTGGAGTCCAGACAT           | TCTGAGGTCCTTTCCACCAT           |
| AL390961.1 | CCCCGTCTGATTCAGGAGT            | TTTCTGATCATTGGTTTGATTG         |
| AC108734.4 | TTGTGTTAGGCAGCAACAGG           | GCAGCCATTCTGTATCGTCA           |
| PAUPAR     | GATCGTTTGCAGGGAAGAAA           | AGAGGTAAGCCTGGAGCACA           |
| AC103718.1 | AAGGACCAAGAGAAAGATGGAG         | GCACATGCTGTGAAACTCTCTT         |
| LMCD1-AS1  | TCCAGGTGTCCGGTTAAGTC           | GCGATCCATTCAGGTCAAAA           |
| AL449106.1 | ACAAAGGCGGCTCACTTAAA           | ACAGAAATTGGGCGGAAAG            |
| AC245297.1 | CCGAGGAGGAAGAAGCAG             | ACGGGACCTTTTCACCACTT           |
| CTAGE11P   | GGTTGGGGTAAAATCCAGGT           | AGGTCCACCACATGTTCCAT           |
| CCDC39     | TTGACATTTCAAACCATCCAA          | CAACGGCTGGAAAATGAGAT           |
| LINC01151  | GCTTCCCACTGGAAAATGGT           | GTGGAGAAGAAGGCAACAGC           |
| ANAPC1P1   | TGATGCTGTTCAAATGTGC            | GTTCCCCCATGTTTCAAGAA           |
| HSPD1P6    | CACCGTAAGCCTTTGGTCAT           | AAAACCTGGAGCCTTGACT            |
| AC015660.1 | AAGGTTATGCGTGACCTCT            | GCTGATGTTCTCTCTGGATG           |
| AL162591.2 | GGCAGTAACGCACCATCTCT           | TACTTGCTTGCAGTACTGG            |
| AL353768.2 | AAATACCAAAGGAAACGAGCA          | ACTTGTGCTCTGCAATCCTG           |
| CAD        | CCATCCCAGCATTGATCAC            | CATGAGCTGCTATGCCGAC            |
| NCL        | GACGAAGATGATGAGGATGACG         | CAACTTTTGCAGCTTTCTTCTCT        |
| RHOT       | TTTGGCTTCGAGCAAGTTTT           | TTGTTTTTGGTAGGGACAGTATTC       |
| ZNF703     | GTCCTCCACTCCCGTCAG             | GATCTGCGAGCAGGTCTGAG           |
| ADGRA2     | GACTCAGGTTCCCTTCTTGCT          | GGACTCCCGGAGAATAGAGG           |
| WDR11      | CAGGGAGCAGTTCTCTTGC            | TTCATGGGTTCCTCTTGG             |
| BMP7_promo | GGGGACTTTTGGACTAGATGG          | CTGGCATTTTTCTGCTCCTT           |

|                  |                       |                      |
|------------------|-----------------------|----------------------|
| AC116407.1_promo | CGCCTCCTTTCAGACCTTCT  | CGCAATCCCTATTGGTCAGT |
| AC091182.1_promo | GCCCCAGAAAAGAAGACTCA  | CCGTAGCTGCAGATGAAATG |
| AC010998.3_promo | GCTGGAACAGACTAAGGCACA | TTCAGGACAGGAATGGGTCT |
