# Supplementary material for: Identification and Functional Characterization of Novel MYC-Regulated Long Noncoding RNAs in Group 3 Medulloblastoma
Source: MDPI journal article supplement (doi:10.3390/cancers13153853), 2021-07-30
Supplement: s1 [file s1]

Fig. 1

A

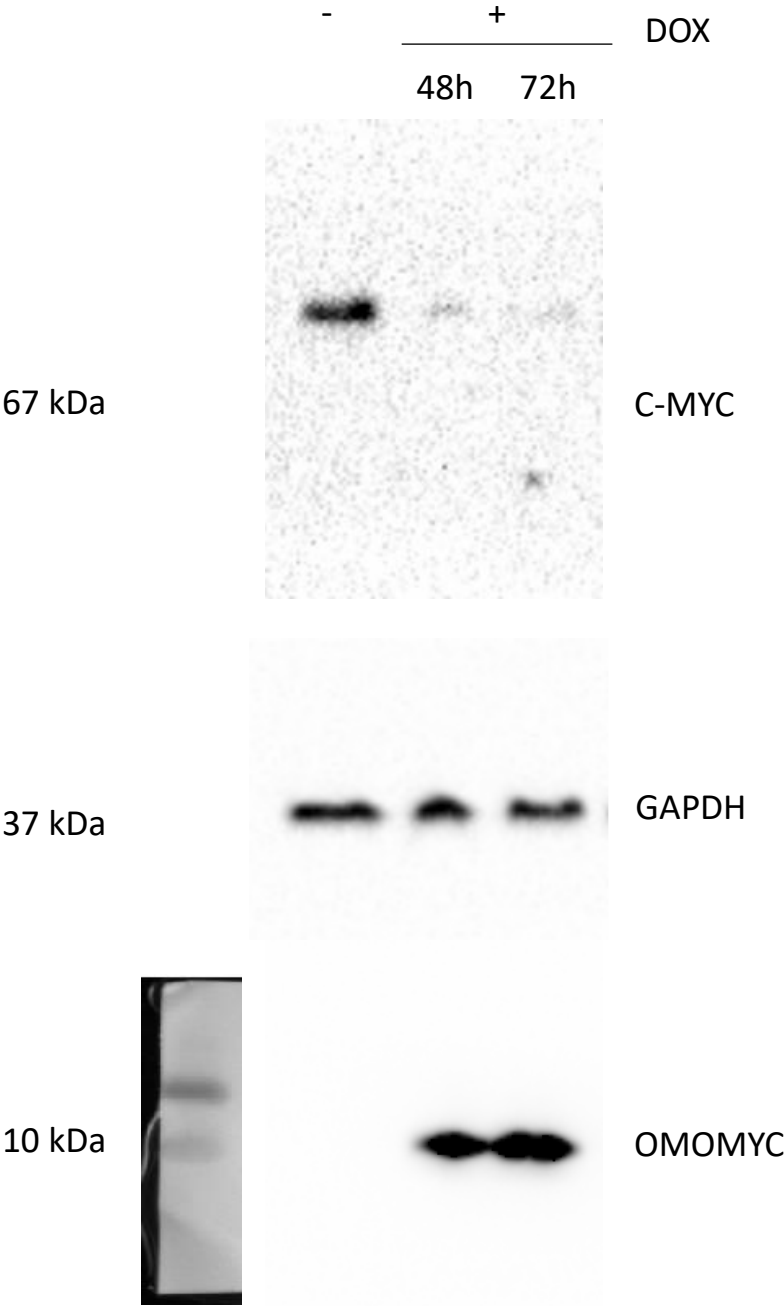

|           | GAPDH  | OMOMYC   | C-MYC   | OMOMYC/GAPDH | C-MYC/GAPDH | FC OMOMYC   | FC C-MYC |
|-----------|--------|----------|---------|--------------|-------------|-------------|----------|
| DOX -     | 875457 | 232933   | 1545355 | 0.266070178  | 1.765198062 | 0.01302679  | 1        |
| DOX + 48h | 644303 | 11239345 | 215440  | 17.44419163  | 0.334376838 | 0.854067251 | 0.189427 |
| DOX + 72h | 706857 | 14437445 | 200509  | 20.42484548  | 0.283662749 | 1           | 0.160697 |

Fig. 10

B

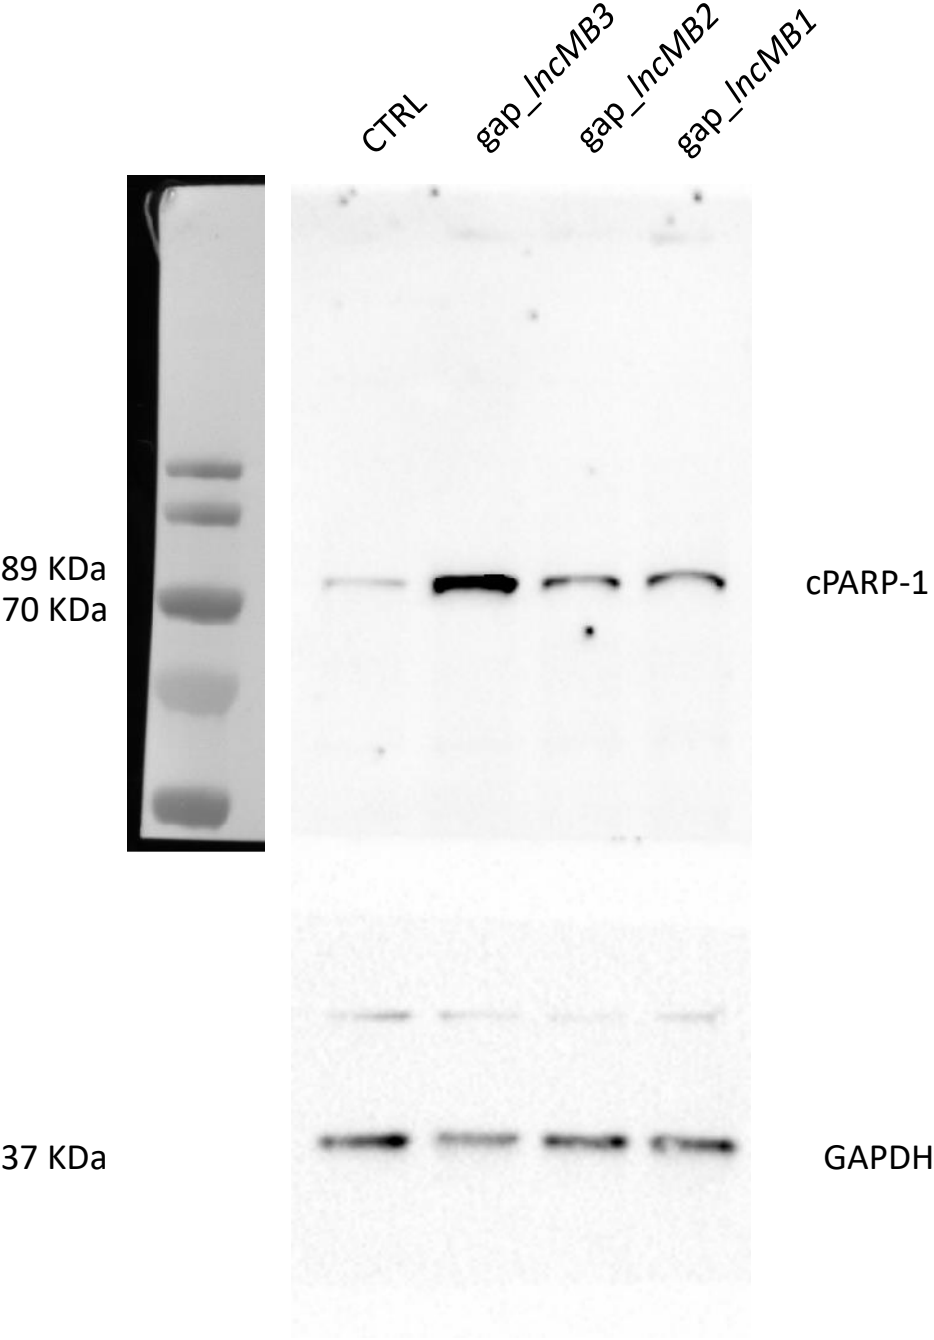

|               | GAPDH   | cPARP-1 | cPARP/GAPDH | FC cPARP-1 |
|---------------|---------|---------|-------------|------------|
| gapCTRL       | 2499192 | 551369  | 0.2206189   | 1          |
| gapAC010998.3 | 1360408 | 6993176 | 5.14049903  | 23.30036   |
| gapAC091182.1 | 2030440 | 1981671 | 0.97598107  | 4.423832   |
| gapRHOT1-AS   | 2098923 | 2218623 | 1.05702925  | 4.7912     |

Fig. 10

C

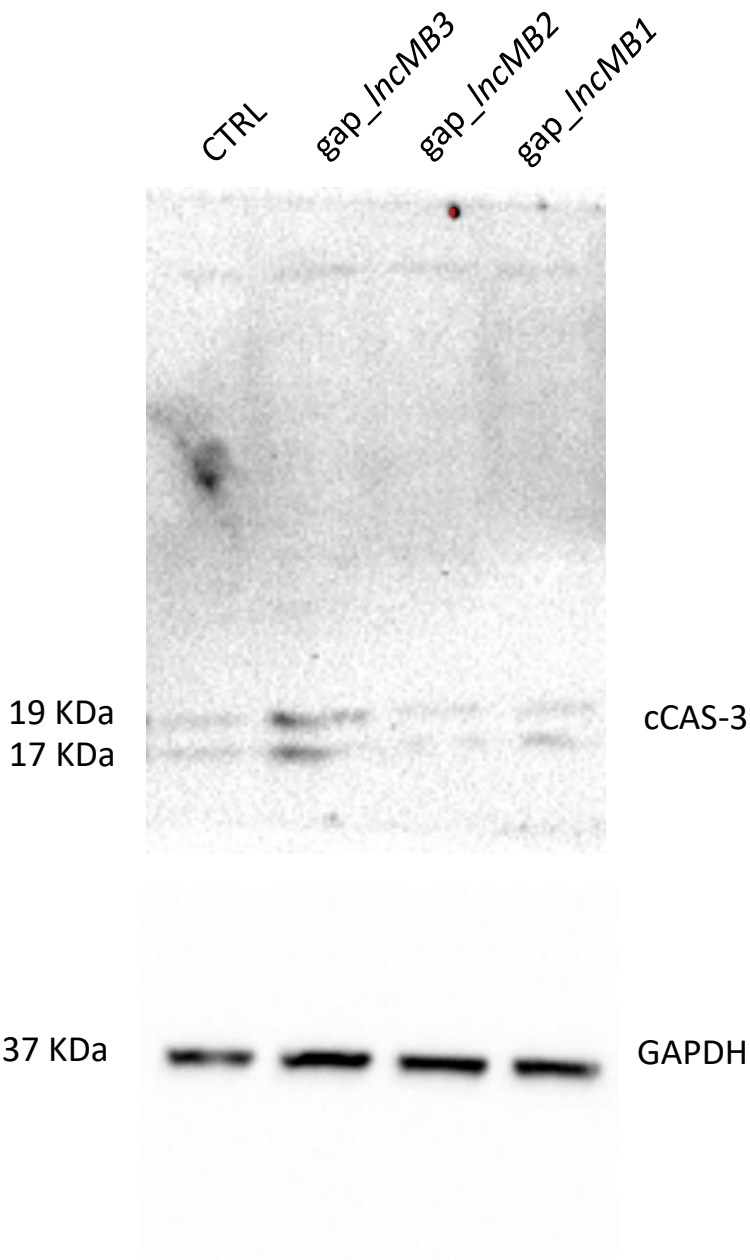

|            | GAPDH    | c-Cas3   | c-Cas3/GAPDH | FC cCas-3 |
|------------|----------|----------|--------------|-----------|
| gapCTRL    | 1913.695 | 406.087  | 0.21220048   | 1         |
| gap_IncMB3 | 2787.254 | 1712.026 | 0.61423394   | 2.894593  |
| gap_IncMB2 | 2537.508 | 336.25   | 0.1325119    | 0.624466  |
| gap_IncMB1 | 2279.489 | 458.251  | 0.20103234   | 0.94737   |

Fig. 12

B

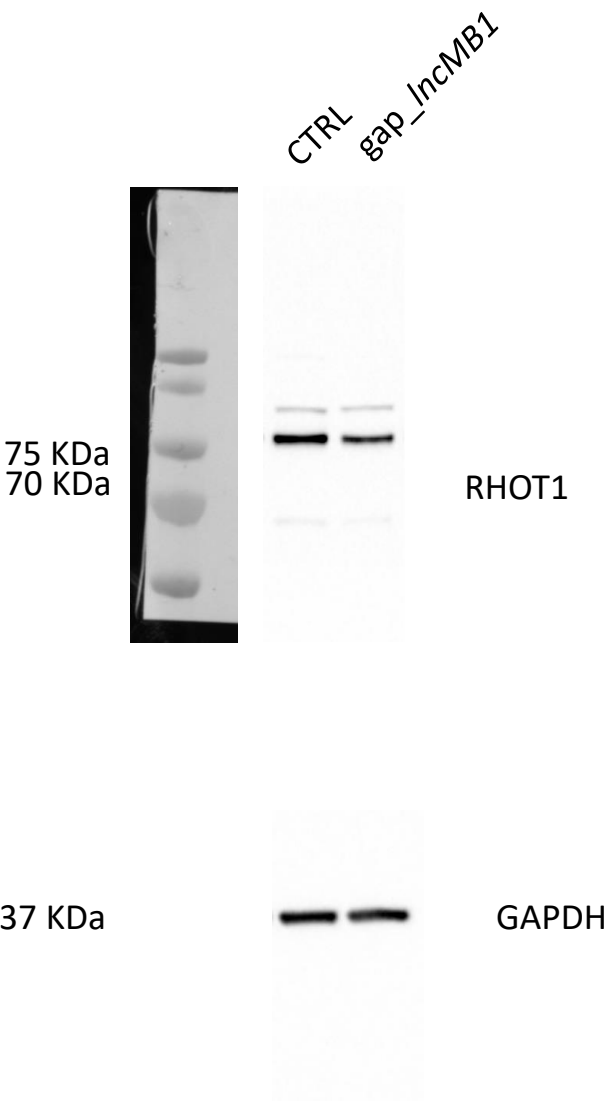

|            | GAPDH    | RHOT1   | RHOT1/GAPDH | FC RHOT1 |
|------------|----------|---------|-------------|----------|
| CTRL       | 2.206154 | 481.787 | 218.383214  | 1        |
| gap_IncMB1 | 2.328482 | 406.322 | 174.500812  | 0.799058 |
